# Supplementary material for: Animal-Assisted Intervention Improves Pain Perception in Polymedicated Geriatric Patients with Chronic Joint Pain: A Clinical Trial
Source: PubMed Central journal article supplement (PMC6721103; doi:10.3390/ijerph16162843), 2019-08-09
Supplement: ijerph-16-02843-s001.pdf [file ijerph-16-02843-s001.pdf]

Supplementary Table 1. Objectives, exercises and descriptions of therapy dog participation in each session.

| SESSION | FOCUS                                 | EXERCISES                                                                                                                                                                                                                                                                                                                                   | THERAPY DOG PARTICIPATION                                                                                                                                                                                                                                                                                                                                                                                                                                                                                                                |
|---------|---------------------------------------|---------------------------------------------------------------------------------------------------------------------------------------------------------------------------------------------------------------------------------------------------------------------------------------------------------------------------------------------|------------------------------------------------------------------------------------------------------------------------------------------------------------------------------------------------------------------------------------------------------------------------------------------------------------------------------------------------------------------------------------------------------------------------------------------------------------------------------------------------------------------------------------------|
| 1       | Lower extremities in sitting position | <ol style="list-style-type: none"> <li>1. Toe to heel, trampling, crossing legs above knee.</li> <li>2. Knee bending-stretching.</li> <li>3. Ball shooting.</li> <li>4. Passing a small hoop from the foot to the hip.</li> </ol>                                                                                                           | <ol style="list-style-type: none"> <li>1. The therapy dog marks the shift of the participant's exercise based on specific gestures.</li> <li>2. The therapy dog sits in front of the participant, who has to extend his leg until he/she touches the dog with his/her foot.</li> <li>3. The therapy dog fetches the balls.</li> <li>4. The therapy dog distributes the hoops.</li> </ol>                                                                                                                                                 |
| 2       | Upper extremities in sitting position | <ol style="list-style-type: none"> <li>1. Gathering a ball from the ground with one hand.</li> <li>2. Gathering a ball from the ground with two hands.</li> <li>3. Sitting in a circle and passing a ball to the participant sitting on his/her side.</li> <li>4. Passing a big hoop with two hands from the feet to hip height.</li> </ol> | <ol style="list-style-type: none"> <li>1, 2. The therapy dog lies on the side of the participant. The participant has to pet the dog performing lateral flexion of the trunk while gathering the ball.</li> <li>3. The therapy dog sits in the middle and when indicated by the physiotherapist, the ball is thrown at the dog.</li> <li>4. The therapy dog distributes hoops and at the end, a tunnel of hoops is made so the dog can pass through it.</li> </ol>                                                                       |
| 3       | Dorsal spine in sitting position      | <p>Different exercises for working on:</p> <ol style="list-style-type: none"> <li>1. Dorsal spine flexion.</li> <li>2. Dorsal spine extension.</li> </ol> <p>Between the different exercises, the participants roll one dice in order to decide which skill the dog has to perform.</p>                                                     | <ol style="list-style-type: none"> <li>1. The therapy dog lies between the legs of the participant. He/she must pet it with the back of his hand.</li> <li>2. The therapy dog sits side-back of the participant and he/she must ask for the dog's paw</li> <li>1, 2. The therapy dog sits in front of the participant and he/she must reach the dog with a slalom bar by flexing his/her back.</li> <li>1, 2. The participant throws a ball to the dog with 2 hands in order to perform a dorsal spine flexion and extension.</li> </ol> |
| 4       | Cervical rachis in sitting position   | <ol style="list-style-type: none"> <li>1. Rolling a small ball from the hand to the neck with the arm in different abduction degrees.</li> <li>2. Passing a hoop from the hand to the neck with the arm in different abduction degrees.</li> <li>3. Lateral tilt, flexion and extension cervical exercises.</li> </ol>                      | <ol style="list-style-type: none"> <li>1. The therapy dog is in the center of the room and participants must throw the ball directly into the dog's mouth (without it falling to the ground).</li> <li>2. The participants put the hoops on the neck of the therapy dog that is sitting in front of them.</li> <li>3. The therapy dog waits with the participants while performing the exercises.</li> </ol>                                                                                                                             |
| 5       | Lumbar rachis in sitting position     | <ol style="list-style-type: none"> <li>1. Raising a slalom pole from the knees to different heights.</li> <li>2. Lifting/lowering a ribbon held by two people.</li> </ol>                                                                                                                                                                   | <ol style="list-style-type: none"> <li>1. Before starting the exercise the participants ask the therapy dog to spin around the pole.</li> <li>2. The dog goes under or jumps over the ribbon.</li> </ol>                                                                                                                                                                                                                                                                                                                                 |
| 6       | Static Standing and Upper Extremities | <ol style="list-style-type: none"> <li>1, 2. Throwing a ball following different instructions.</li> </ol>                                                                                                                                                                                                                                   | <ol style="list-style-type: none"> <li>1. The participants play basketball with the therapy dog.</li> <li>2. The therapy dog is located in the middle of the room. Each half of the</li> </ol>                                                                                                                                                                                                                                                                                                                                           |

|      |                      |                                                                                                                                                                                                                                                                                    |                                                                                                                                                                                                                                                                                                                                                                                                                                                                                                                                                                                                                                  |
|------|----------------------|------------------------------------------------------------------------------------------------------------------------------------------------------------------------------------------------------------------------------------------------------------------------------------|----------------------------------------------------------------------------------------------------------------------------------------------------------------------------------------------------------------------------------------------------------------------------------------------------------------------------------------------------------------------------------------------------------------------------------------------------------------------------------------------------------------------------------------------------------------------------------------------------------------------------------|
|      |                      |                                                                                                                                                                                                                                                                                    | group is on each side of the room and throws the balls over the dog.                                                                                                                                                                                                                                                                                                                                                                                                                                                                                                                                                             |
| 7    | Static Standing      | <ol style="list-style-type: none"> <li>1. Bouncing a ball with one or two hands.</li> <li>2. Passing a ball from one hand to another through the lower back.</li> <li>3. Kicking a ball following the instructions: right / left leg, sideways ...</li> </ol>                      | <ol style="list-style-type: none"> <li>1. The therapy dog passes between the participants while performing the exercise.</li> <li>2. The exercise is performed with food instead of a ball for the therapy dog to surround the participants.</li> <li>3. The therapy dog acts as a goalkeeper while the participants kick the ball.</li> </ol>                                                                                                                                                                                                                                                                                   |
| 8-11 | Dynamic Standing     | <ol style="list-style-type: none"> <li>1, 2, 3. Exercises to work the forward, backward and sideways march.</li> <li>4. Exercise to work height changes.</li> <li>5. Short paths with orientation changes.</li> </ol>                                                              | <ol style="list-style-type: none"> <li>1. The therapy dog sits at other end of the room and the participants have move to put the collars to their dogs.</li> <li>2. Slalom with legs: the participant walks with long steps and therapy dog has to walk under the participant's legs.</li> <li>3. The therapy dog and participants together perform spinning exercises on themselves.</li> <li>4. The participants pick up a hoop from the ground or from a height and put it on the dog's neck.</li> <li>5. Different tracks with cones to perform zigzag and with slalom poles to pass above with the therapy dog.</li> </ol> |
| 12   | Safety Reinforcement | <ol style="list-style-type: none"> <li>1. Participants in a row are passing a ball. Participants in a row swing their arms with a slalom pole.</li> <li>2. Working the march from sitting position.</li> <li>3. Standing up from the floor from sitting and from lying.</li> </ol> | <ol style="list-style-type: none"> <li>1. While performing the exercise the therapy dog walks under the participants legs as a tunnel.</li> <li>2. The participants "run" a relay race accompanied by the therapy dog.</li> <li>3. The therapy dog unfolds a pad so that the participant can lie on the floor.</li> </ol>                                                                                                                                                                                                                                                                                                        |
